# Supplementary material
Source: MDPI journal article supplement (https://www.mdpi.com/2076-3298/11/5/87)
Supplement: s1 [file s1]

# Analysing the evidence of the effects of climate change, air pollutants and social factors in the appearance of cataracts

## Supplementary Material

**Table S1. Evolutionary data on the general population of the study area**

| Municipality            | Altitude<br>(m) | Population 2010 |       |               | Population 2021 |       |               |
|-------------------------|-----------------|-----------------|-------|---------------|-----------------|-------|---------------|
|                         |                 | M               | W     | Total         | M               | W     | Total         |
| 1. Alcaucín             | 518             | 1344            | 1324  | <b>2668</b>   | 1210            | 1156  | <b>2366</b>   |
| 2. Algarrobo            | 86              | 3182            | 3168  | <b>6350</b>   | 3298            | 3253  | <b>6551</b>   |
| 3. Almachar             | 246             | 970             | 929   | <b>1899</b>   | 940             | 903   | <b>1843</b>   |
| 4. Árchez               | 530             | 231             | 215   | <b>446</b>    | 204             | 194   | <b>398</b>    |
| 5. Arenas               | 500             | 742             | 669   | <b>1411</b>   | 615             | 566   | <b>1181</b>   |
| 6. Benamargosa          | 96              | 815             | 795   | <b>1610</b>   | 787             | 748   | <b>1535</b>   |
| 7. Benamocarra          | 145             | 1553            | 1482  | <b>3035</b>   | 1516            | 1514  | <b>3030</b>   |
| 8. Borge (El)           | 257             | 526             | 489   | <b>1015</b>   | 461             | 445   | <b>906</b>    |
| 9. Canillas de Aceituno | 649             | 1181            | 1104  | <b>2285</b>   | 886             | 818   | <b>1704</b>   |
| 10. Canillas de Albaida | 630             | 468             | 456   | <b>924</b>    | 396             | 415   | <b>811</b>    |
| 11. Comares             | 703             | 854             | 761   | <b>1615</b>   | 735             | 614   | <b>1349</b>   |
| 12. Cómpeta             | 636             | 1982            | 1880  | <b>3862</b>   | 1939            | 1927  | <b>3866</b>   |
| 13. Cútar               | 331             | 341             | 330   | <b>671</b>    | 313             | 289   | <b>602</b>    |
| 14. Frigiliana          | 320             | 1568            | 1603  | <b>3171</b>   | 1584            | 1614  | <b>3198</b>   |
| 15. Iznate              | 300             | 481             | 442   | <b>923</b>    | 474             | 438   | <b>912</b>    |
| 16. Nerja               | 26              | 10876           | 11081 | <b>21957</b>  | 10357           | 10661 | <b>21018</b>  |
| 17. Periana             | 550             | 1868            | 1734  | <b>3602</b>   | 1644            | 1515  | <b>3159</b>   |
| 18. Salares             | 571             | 109             | 96    | <b>205</b>    | 88              | 85    | <b>173</b>    |
| 19. Sayalonga           | 359             | 782             | 773   | <b>1555</b>   | 832             | 782   | <b>1614</b>   |
| 20. Sedella             | 646             | 370             | 317   | <b>687</b>    | 336             | 256   | <b>592</b>    |
| 21. Torrox              | 120             | 8691            | 8612  | <b>17303</b>  | 9547            | 9390  | <b>18937</b>  |
| 22. Vélez-Málaga        | 60              | 37630           | 37993 | <b>75623</b>  | 40919           | 42048 | <b>82967</b>  |
| 23. Viñuela             | 150             | 1014            | 979   | <b>2668</b>   | 1062            | 983   | <b>2045</b>   |
| TOTAL                   | -----           | 77578           | 77232 | <b>154810</b> | 80143           | 80614 | <b>160757</b> |

**Table S2. Evolutionary data on the population over 15 years old in the study area**

| Municipality            | Population 2010 >15 years old |      |             | Population 2021 >15 years old |      |             |
|-------------------------|-------------------------------|------|-------------|-------------------------------|------|-------------|
|                         | M                             | W    | Total       | M                             | W    | Total       |
| 1. Alcaucín             | 1177                          | 1176 | <b>2353</b> | 1092                          | 1036 | <b>2128</b> |
| 2. Algarrobo            | 2704                          | 2706 | <b>5410</b> | 2827                          | 2801 | <b>5628</b> |
| 3. Almachar             | 836                           | 796  | <b>1632</b> | 823                           | 777  | <b>1600</b> |
| 4. Árchez               | 205                           | 191  | <b>396</b>  | 189                           | 175  | <b>364</b>  |
| 5. Arenas               | 652                           | 584  | <b>1236</b> | 550                           | 500  | <b>1050</b> |
| 6. Benamargosa          | 717                           | 718  | <b>1435</b> | 702                           | 669  | <b>1371</b> |
| 7. Benamocarra          | 1326                          | 1259 | <b>2585</b> | 1255                          | 1263 | <b>2518</b> |
| 8. Borge (El)           | 469                           | 431  | <b>900</b>  | 418                           | 387  | <b>805</b>  |
| 9. Canillas de Aceituno | 1032                          | 995  | <b>2027</b> | 808                           | 741  | <b>1549</b> |
| 10. Canillas de Albaida | 433                           | 407  | <b>840</b>  | 356                           | 375  | <b>731</b>  |
| 11. Comares             | 765                           | 688  | <b>1453</b> | 677                           | 567  | <b>1244</b> |
| 12. Cómpeta             | 1734                          | 1645 | <b>3379</b> | 1746                          | 1723 | <b>3469</b> |
| 13. Cútar               | 306                           | 304  | <b>610</b>  | 287                           | 268  | <b>555</b>  |

|                  |              |              |               |              |              |               |
|------------------|--------------|--------------|---------------|--------------|--------------|---------------|
| 14. Frigiliana   | 1336         | 1376         | <b>2712</b>   | 1345         | 1374         | <b>2719</b>   |
| 15. Iznate       | 410          | 366          | <b>776</b>    | 403          | 357          | <b>760</b>    |
| 16. Nerja        | 9288         | 9641         | <b>18929</b>  | 8979         | 9359         | <b>18338</b>  |
| 17. Periana      | 1588         | 1498         | <b>3086</b>   | 1440         | 1332         | <b>2772</b>   |
| 18. Salares      | 101          | 91           | <b>192</b>    | 76           | 71           | <b>147</b>    |
| 19. Sayalonga    | 688          | 685          | <b>1373</b>   | 752          | 714          | <b>1466</b>   |
| 20. Sedella      | 347          | 295          | <b>642</b>    | 317          | 241          | <b>558</b>    |
| 21. Torrox       | 7547         | 7528         | <b>15075</b>  | 8384         | 8251         | <b>16635</b>  |
| 22. Vélez-Málaga | 31090        | 31714        | <b>62804</b>  | 34128        | 35546        | <b>69674</b>  |
| 23. Viñuela      | 893          | 873          | <b>1766</b>   | 946          | 898          | <b>1844</b>   |
| <b>TOTAL</b>     | <b>65644</b> | <b>65967</b> | <b>131611</b> | <b>68500</b> | <b>69425</b> | <b>137925</b> |

**Table S3. Spatial and population data for the study area. Standardized Cumulative cataract incidence in population 15-59 years old (2011-2021); employment data (average 2010-2020) and income (2019 data)**

| Municipality | Cat <60 years * | Standardized cumulative cataract incidence Men <60 * | Standardized cumulative cataract incidence Women <60 * | Total Standardized cumulative cataract incidence <60 * | Employment % |       |       |       | Income (€) |              |                 |
|--------------|-----------------|------------------------------------------------------|--------------------------------------------------------|--------------------------------------------------------|--------------|-------|-------|-------|------------|--------------|-----------------|
|              |                 |                                                      |                                                        |                                                        | Agric        | Indus | Cons  | Serv  | Net (INE)  | Gross (IECA) | Household (INE) |
| 1            | < 10            | < 50                                                 | < 50                                                   | < 50                                                   | 16.48        | 4.25  | 19.63 | 59.65 | 9172       | 9560         | 21031           |
| 2            | 39              | 91,46                                                | 33,46                                                  | 63,15                                                  | 21.49        | 3.25  | 19.55 | 55.71 | 9963       | 12356        | 24593           |
| 3            | 14              | 97,93                                                | 56,44                                                  | 77,92                                                  | 15.72        | 2.25  | 38.82 | 43.20 | 8498       | 6832         | 20569           |
| 4            | < 10            | < 50                                                 | < 50                                                   | < 50                                                   | 18.18        | 0.88  | 50.92 | 30.02 | 9897       | 7402         | 20894           |
| 5            | < 10            | 68,19                                                | < 50                                                   | < 50                                                   | 27.59        | 2.64  | 20.60 | 49.17 | 9466       | 8177         | 19183           |
| 6            | < 10            | < 50                                                 | 57,85                                                  | < 50                                                   | 22.08        | 3.65  | 13.65 | 60.62 | 8789       | 8013         | 19178           |
| 7            | 19              | 83,94                                                | 39,98                                                  | 61,92                                                  | 28.99        | 4.54  | 19.59 | 46.88 | 9509       | 10144        | 23931           |
| 8            | < 10            | < 50                                                 | < 50                                                   | < 50                                                   | 12.51        | 1.15  | 21.75 | 64.59 | 9058       | 7248         | 18756           |
| 9            | < 10            | < 50                                                 | < 50                                                   | < 50                                                   | 13.35        | 7.11  | 37.28 | 42.26 | 9604       | 8801         | 20249           |
| 10           | < 10            | < 50                                                 | < 50                                                   | < 50                                                   | 12.97        | 0.88  | 25.04 | 61.12 | 10354      | 9729         | 21164           |
| 11           | < 10            | < 50                                                 | < 50                                                   | < 50                                                   | 20.22        | 2.36  | 45.24 | 32.18 | 8552       | 7348         | 19745           |
| 12           | < 10            | < 50                                                 | < 50                                                   | < 50                                                   | 7.17         | 3.46  | 29.45 | 59.92 | 8376       | 10021        | 20142           |
| 13           | < 10            | < 50                                                 | < 50                                                   | < 50                                                   | 16.76        | 1.55  | 24.82 | 56.86 | 9090       | 8510         | 18421           |
| 14           | 14              | 54,16                                                | < 50                                                   | < 50                                                   | 4.07         | 3.08  | 18.71 | 74.13 | 10684      | 12927        | 26267           |
| 15           | < 10            | 64,98                                                | < 50                                                   | 58,31                                                  | 20.24        | 2.97  | 35.51 | 41.28 | 8006       | 8193         | 19098           |
| 16           | 115             | 68,40                                                | < 50                                                   | 57,37                                                  | 1.59         | 2.62  | 13.27 | 82.52 | 10913      | 13823        | 28617           |
| 17           | 11              | < 50                                                 | < 50                                                   | < 50                                                   | 32.37        | 2.18  | 21.73 | 43.72 | 8766       | 8131         | 20259           |
| 18           | < 10            | < 50                                                 | < 50                                                   | < 50                                                   | 2.12         | 2.50  | 48.74 | 46.65 | 9974       | 7091         | 19949           |
| 19           | < 10            | < 50                                                 | < 50                                                   | < 50                                                   | 13.72        | 16.19 | 37.84 | 32.26 | 8518       | 9331         | 18115           |
| 20           | < 10            | < 50                                                 | < 50                                                   | < 50                                                   | 11.34        | 0.38  | 30.66 | 57.62 | 10609      | 8327         | 19005           |
| 21           | 84              | 64,13                                                | 44,15                                                  | 54,24                                                  | 7.84         | 4.32  | 14.69 | 73.15 | 9553       | 12624        | 22780           |
| 22           | 493             | 68,48                                                | 54,18                                                  | 61,12                                                  | 11.09        | 6.14  | 20.74 | 62.03 | 11367      | 15070        | 29961           |
| 23           | < 10            | < 50                                                 | 51,08                                                  | < 50                                                   | 14.11        | 4.50  | 21.47 | 59.93 | 8973       | 10064        | 21096           |

\*In compliance with the Spanish Data Protection Law and in order to safeguard as much information about individuals as possible, municipalities whose number of cataracts is less than 10 in the 11 years of the study, or whose incidence is less than 0.005 ( $< 50 \cdot 10^{-4}$ ) have been recorded as follows: <10 (number of cataracts); <50 (standardized cumulative cataracts incidence  $\cdot 10^{-4}$  inhabitants). In villages with small

populations such as those analysed in this study, it may be easy to identify such individuals, which is what we are trying to avoid in this way.

Municipalities: 1. Alcaucín; 2. Algarrobo; 3. Almachar; 4. Árchez; 5. Arenas; 6. Benamargosa; 7. Benamocarra; 8. El Borge; 9. Canillas de Aceituno; 10. Canillas de Albaida; 11. Comares; 12. Cómpeta; 13. Cútar; 14. Frigiliana; 15. Iznate; 16. Nerja; 17. Periana; 18. Salares; 19. Sayalonga; 20. Sedella; 21. Torrox; 22. Vélez-Málaga; 23. Viñuela

INE: Instituto Nacional de Estadística. IECA: Instituto de Estadística y Cartografía de Andalucía. Income INE and Income IECA refer to per capita annual income in euros

**Table S4. Climate and pollution data for the study area 30-year average values (1990-2020) for climate data (except insolation and humidity), and 11-year average values (2010-2020) for pollution data**

| Municipality | Average annual Temperature | Annually-Average Maximum Temperature | Annual Absolute Maximum temperature | Insolation (*) | Precipitation (mm) | Average Annual Humidity % | Average CO <sub>2</sub> (Kt) | Average CO (t) | Average CH <sub>4</sub> (t) | Average N <sub>2</sub> O (t) | Average PM <sup>10</sup> (t) | Average PM <sub>2.5</sub> (t) | Average Σ Pollutants (Kt) |
|--------------|----------------------------|--------------------------------------|-------------------------------------|----------------|--------------------|---------------------------|------------------------------|----------------|-----------------------------|------------------------------|------------------------------|-------------------------------|---------------------------|
| 1            | 16,03                      | 21,11                                | 26,97                               | 3731           | 623,5              | 64,9                      | 7,0                          | 159,9          | 30,4                        | 3,8                          | 19,3                         | 15,7                          | 79,9                      |
| 2            | 18,30                      | 22,53                                | 27,73                               | 4143           | 430,2              | 66,1                      | 12,5                         | 46,0           | 13,7                        | 1,9                          | 6,2                          | 4,7                           | 140,9                     |
| 3            | 17,46                      | 22,01                                | 27,45                               | 3892           | 501,8              | 65,7                      | 2,8                          | 46,2           | 14,0                        | 1,8                          | 5,9                          | 4,3                           | 33,3                      |
| 4            | 15,97                      | 21,07                                | 26,95                               | 3783           | 628,8              | 64,9                      | 1,3                          | 22,1           | 3,0                         | 0,7                          | 2,5                          | 2,0                           | 16,2                      |
| 5            | 16,13                      | 21,17                                | 27,00                               | 3839           | 615,4              | 65,0                      | 3,4                          | 81,5           | 10,6                        | 3,1                          | 10,2                         | 7,4                           | 39,8                      |
| 6            | 18,25                      | 22,50                                | 27,71                               | 3940           | 434,7              | 66,1                      | 3,1                          | 30,8           | 6,4                         | 1,9                          | 4,7                          | 3,2                           | 36,2                      |
| 7            | 17,99                      | 22,34                                | 27,62                               | 4050           | 456,6              | 66,0                      | 3,8                          | 30,9           | 9,2                         | 1,1                          | 4,5                          | 3,5                           | 41,3                      |
| 8            | 17,40                      | 21,97                                | 27,43                               | 3790           | 506,7              | 65,7                      | 2,3                          | 71,0           | 23,4                        | 2,2                          | 7,9                          | 5,9                           | 28,0                      |
| 9            | 15,34                      | 20,68                                | 26,74                               | 3845           | 682,1              | 64,5                      | 5,1                          | 103,7          | 28,2                        | 2,6                          | 12,8                         | 10,1                          | 58,3                      |
| 10           | 15,44                      | 20,74                                | 26,77                               | 3754           | 673,6              | 64,6                      | 2,4                          | 56,9           | 10,5                        | 1,4                          | 7,6                          | 5,6                           | 29,1                      |
| 11           | 15,06                      | 20,50                                | 26,65                               | 3760           | 706,2              | 64,4                      | 4,4                          | 64,9           | 26,6                        | 3,3                          | 13,2                         | 10,4                          | 52,1                      |
| 12           | 15,41                      | 20,72                                | 26,76                               | 3742           | 676,2              | 64,6                      | 6,1                          | 143,2          | 28,0                        | 2,0                          | 15,3                         | 12,4                          | 70,1                      |
| 13           | 17,01                      | 21,73                                | 27,30                               | 3843           | 539,8              | 65,4                      | 2,3                          | 52,6           | 12,7                        | 2,2                          | 6,5                          | 4,7                           | 27,8                      |
| 14           | 17,07                      | 21,76                                | 27,32                               | 3754           | 534,9              | 65,5                      | 8,2                          | 69,7           | 14,5                        | 2,0                          | 8,6                          | 6,9                           | 93,0                      |
| 15           | 17,18                      | 21,83                                | 27,35                               | 3984           | 525,9              | 65,5                      | 2,2                          | 25,7           | 5,5                         | 3,0                          | 7,7                          | 4,4                           | 26,7                      |
| 16           | 18,62                      | 22,73                                | 27,83                               | 4138           | 403,3              | 66,3                      | 53,8                         | 215,1          | 27,4                        | 4,3                          | 20,7                         | 17,0                          | 597,7                     |
| 17           | 15,86                      | 21,00                                | 26,91                               | 4030           | 637,8              | 64,8                      | 8,6                          | 240,4          | 98,0                        | 8,2                          | 27,2                         | 19,8                          | 98,3                      |
| 18           | 15,75                      | 20,93                                | 26,88                               | 3861           | 647,2              | 64,7                      | 0,9                          | 18,2           | 3,3                         | 0,7                          | 2,2                          | 1,6                           | 11,6                      |
| 19           | 16,87                      | 21,63                                | 27,25                               | 3774           | 552,3              | 65,4                      | 3,2                          | 64,7           | 5,9                         | 2,0                          | 8,0                          | 6,3                           | 37,2                      |
| 20           | 15,36                      | 20,69                                | 26,75                               | 3820           | 680,7              | 64,5                      | 1,8                          | 48,9           | 24,3                        | 1,7                          | 5,9                          | 4,3                           | 22,5                      |
| 21           | 18,13                      | 22,42                                | 27,67                               | 4064           | 445,4              | 66,1                      | 41,8                         | 234,0          | 31,6                        | 6,0                          | 27,5                         | 22,2                          | 465,2                     |
| 22           | 18,44                      | 22,62                                | 27,77                               | 4176           | 418,6              | 66,2                      | 158,9                        | 786,1          | 288,3                       | 28,8                         | 97,8                         | 77,4                          | 1769,3                    |
| 23           | 17,97                      | 22,32                                | 27,61                               | 3877           | 458,8              | 66,0                      | 5,8                          | 67,2           | 158,9                       | 2,2                          | 8,4                          | 6,4                           | 67,0                      |

\* Insolation: Direct + Diffuse + Global Radiation in KWh\*m<sup>2</sup>/year<sup>1</sup> Values for CO<sub>2</sub> and Total Pollutants in Kt\*year\*10<sup>-4</sup> inhabitants. Rest of pollutants values in t\*year \*10<sup>-4</sup> inhabitants. Climate data from 1990 to 2020 have been taken to achieve a fit with the World Meteorological Organisation's criteria for using valid samples of climate data.

Municipalities: 1. Alcaucín; 2. Algarrobo; 3. Almachar; 4. Árchez; 5. Arenas; 6. Benamargosa; 7. Benamocarra; 8. El Borge; 9. Canillas de Aceituno; 10. Canillas de Albaida; 11. Comares; 12. Cómpeta; 13. Cútar; 14. Frigiliana; 15. Iznate; 16. Nerja; 17. Periana; 18. Salares; 19. Sayalonga; 20. Sedella; 21. Torrox; 22. Vélez-Málaga; 23. Viñuela

**Figure S1. Average Annual Temperature**

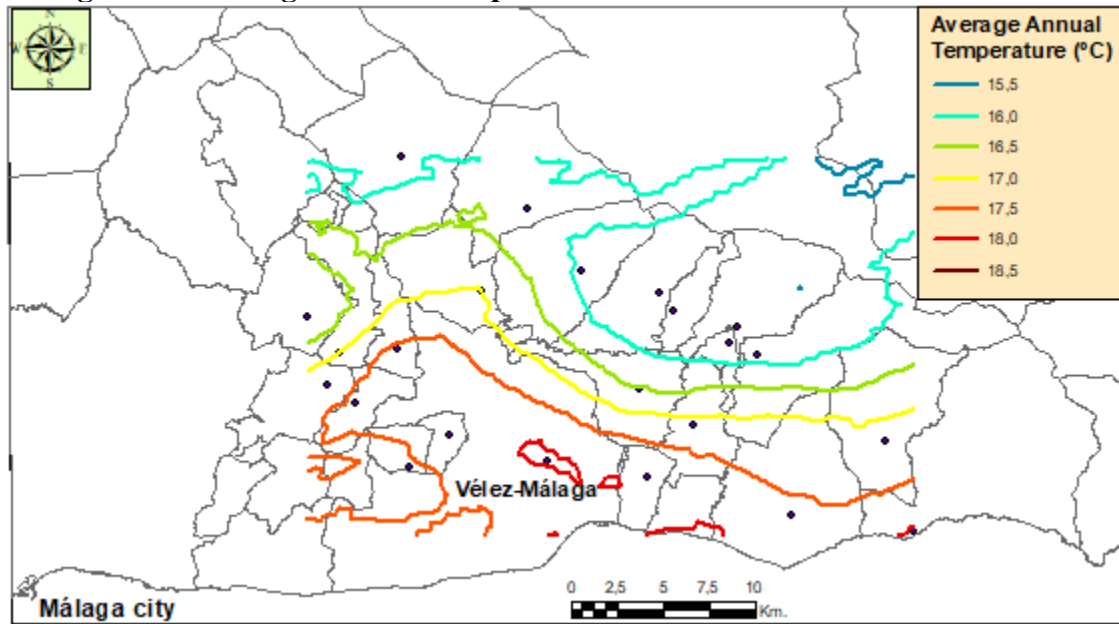

**Figure S2. Annually-Averaged Maximum Temperature**

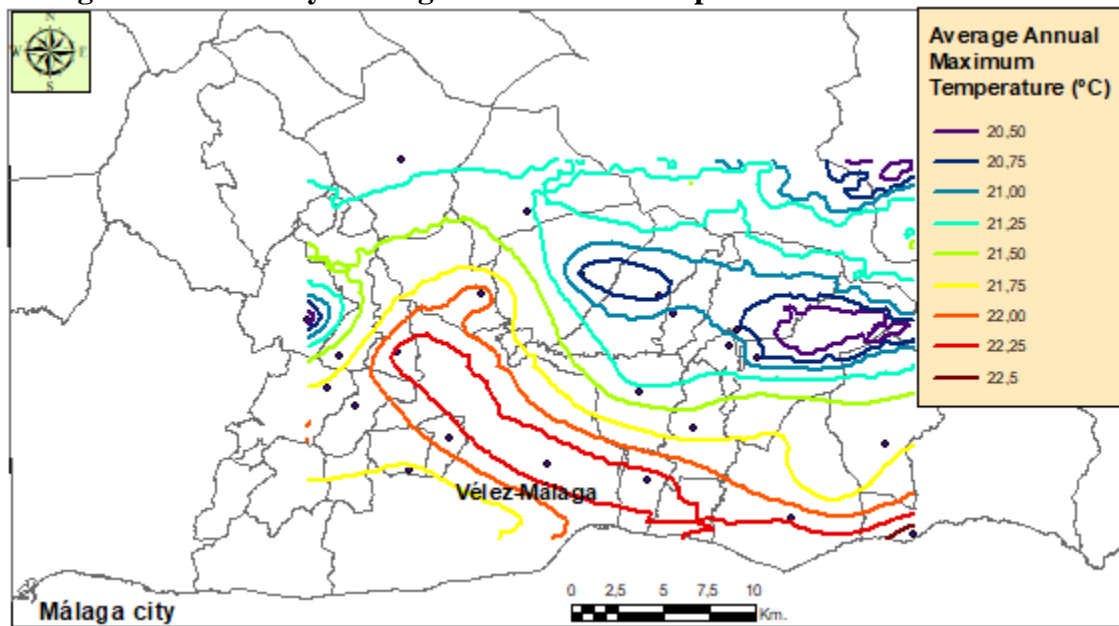

**Figure S3. Annual Absolute Maximum Temperature**

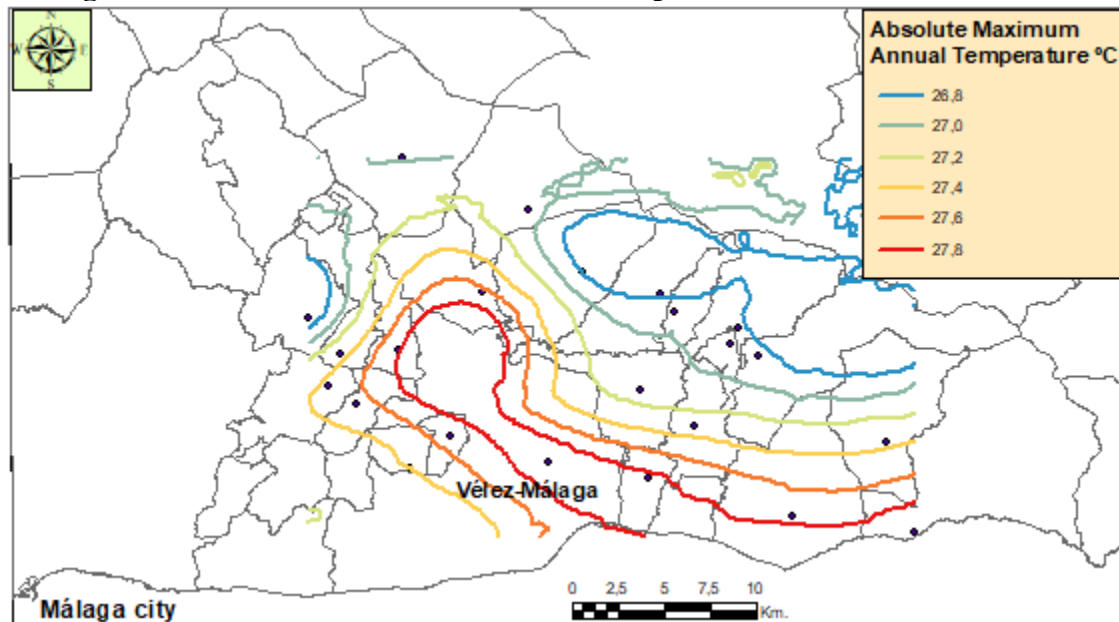

**Figure S4. Average Annual Insolation**

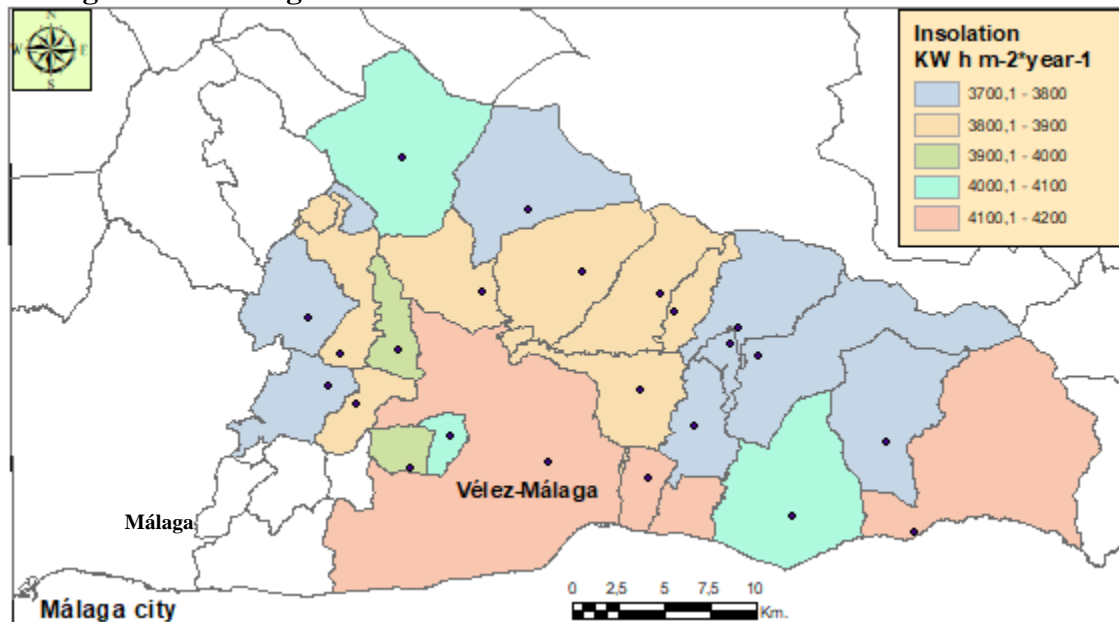

**Figure S5. Sum of Annual Precipitation**

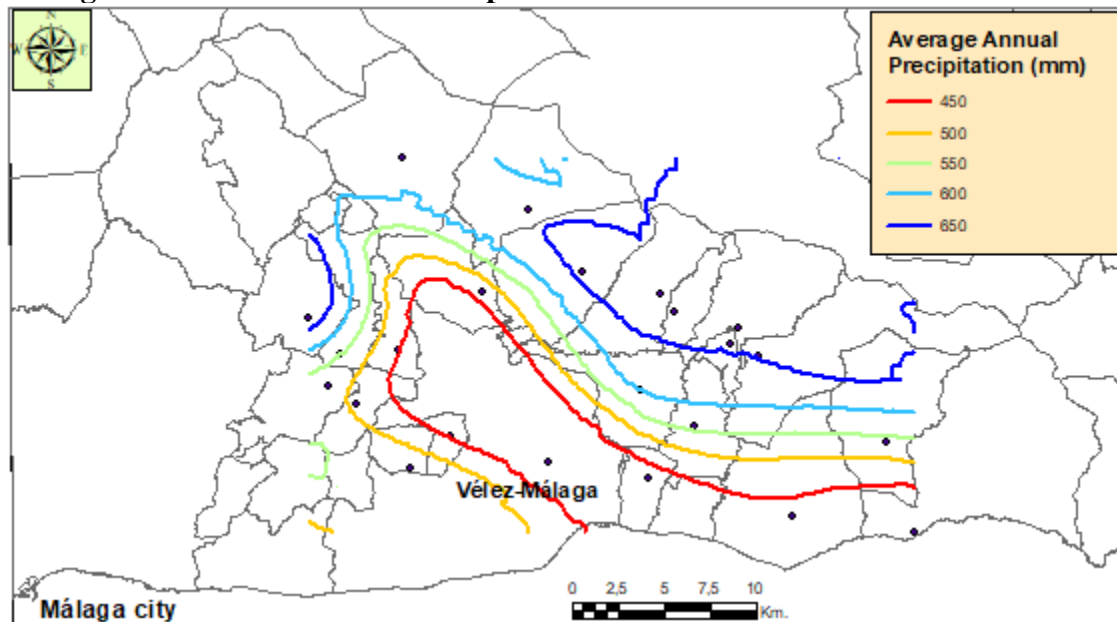

**Figure S6. Standardized Cumulative Cataract Incidence in men under 60 years old**

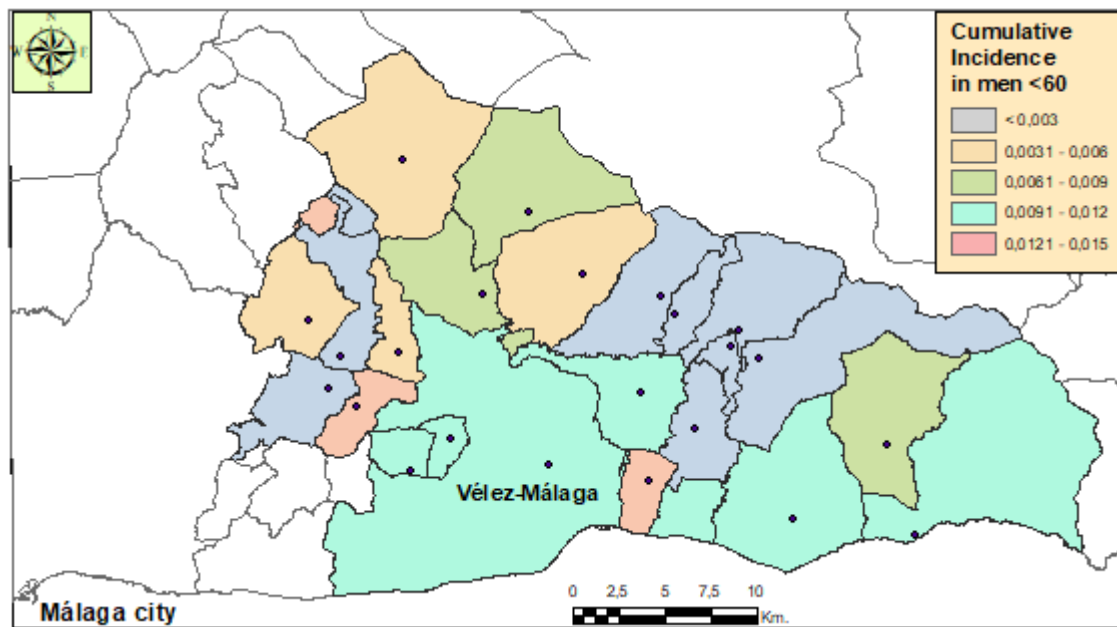

**Figure S7. Standardized Cumulative Cataract Incidence in women under 60 years old**

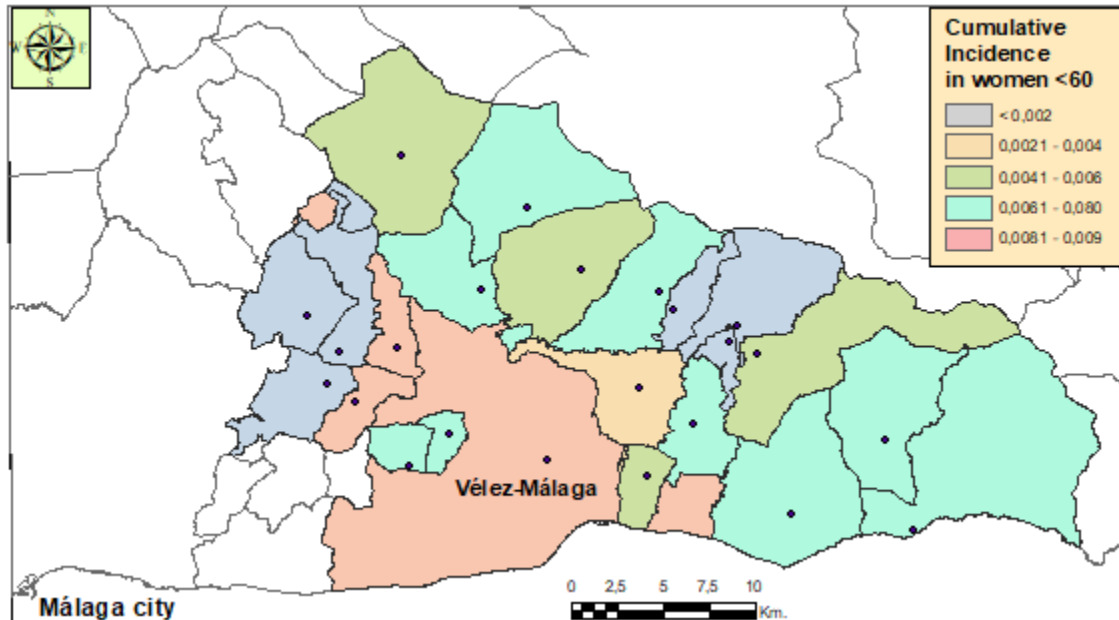

**Figure S8. Standardized Cumulative Cataract Incidence in people under 60 years old**

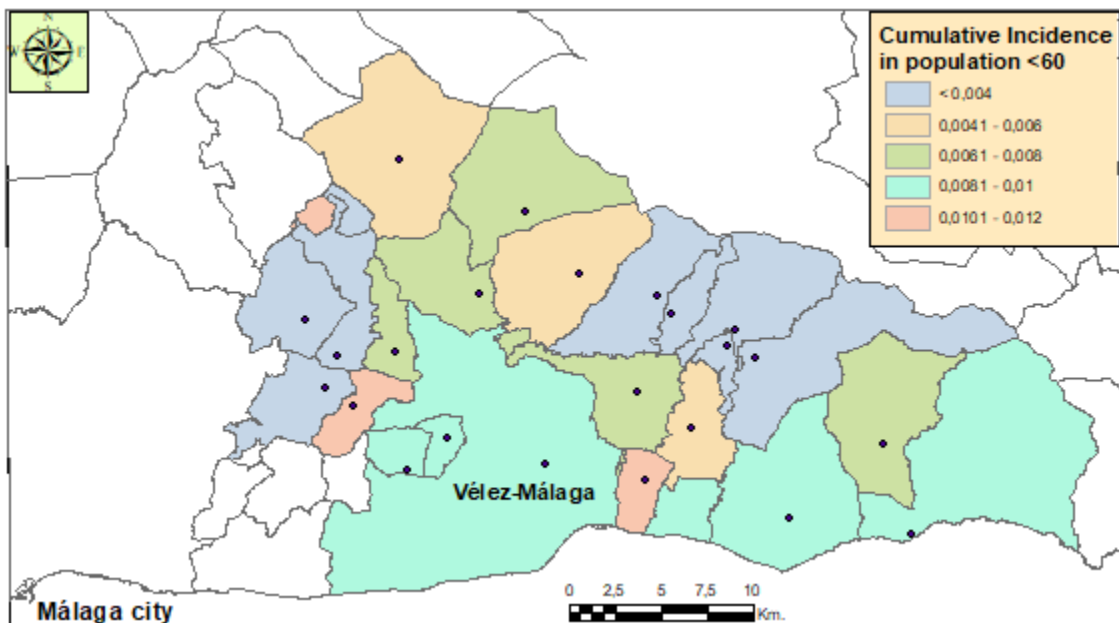

Explanatory note for figures 6 to 8: We have not had segregated municipal data for the population over 60 years of age, only accumulated values for the county, or only disaggregated annual values for the population under 60 years of age.
